# Supplementary material for: Immune Status and Hepatic Antioxidant Capacity of Gilthead Seabream Sparus aurata Juveniles Fed Yeast and Microalga Derived β-glucans
Source: MDPI journal article supplement (doi:10.3390/md19120653), 2021-11-23
Supplement: s1 [file s1]

**Table S1.** Relative gene expression profiling of anterior intestine in gilthead seabream juveniles fed experimental diets for 2 weeks. Data are the mean  $\pm$  SEM (n=9). All data values for each tissue were in reference to the expression level of *cldn12* of CTRL fish with an arbitrary assigned value of 1.

|                    | CTRL                           | MG                            | Phaco21                       | Phaco37                      | P-value <sup>1</sup> |
|--------------------|--------------------------------|-------------------------------|-------------------------------|------------------------------|----------------------|
| <i>pcna</i>        | 10.22 $\pm$ 0.97 <sup>ab</sup> | 9.59 $\pm$ 0.45 <sup>ab</sup> | 12.99 $\pm$ 1.14 <sup>a</sup> | 9.49 $\pm$ 0.56 <sup>b</sup> | <b>0.028</b>         |
| <i>hes1-b</i>      | 2.37 $\pm$ 0.30                | 1.86 $\pm$ 0.17               | 2.17 $\pm$ 0.18               | 1.88 $\pm$ 0.13              | 0.287                |
| <i>klf4</i>        | 3.48 $\pm$ 0.23                | 4.24 $\pm$ 0.59               | 2.91 $\pm$ 0.29               | 3.03 $\pm$ 0.14              | 0.201                |
| <i>cldn12</i>      | 1.00 $\pm$ 0.04                | 0.98 $\pm$ 0.10               | 1.01 $\pm$ 0.06               | 0.96 $\pm$ 0.05              | 0.350                |
| <i>cldn15</i>      | 17.96 $\pm$ 1.81               | 15.40 $\pm$ 1.75              | 18.87 $\pm$ 1.28              | 15.33 $\pm$ 1.22             | 0.215                |
| <i>cdh1</i>        | 20.23 $\pm$ 0.96               | 19.45 $\pm$ 1.14              | 19.24 $\pm$ 1.13              | 18.33 $\pm$ 1.03             | 0.647                |
| <i>cdh17</i>       | 90.58 $\pm$ 4.54               | 84.13 $\pm$ 4.45              | 89.38 $\pm$ 3.25              | 77.46 $\pm$ 2.93             | 0.084                |
| <i>tjp1</i>        | 0.76 $\pm$ 0.03                | 0.74 $\pm$ 0.04               | 0.74 $\pm$ 0.03               | 0.76 $\pm$ 0.04              | 0.942                |
| <i>dsp</i>         | 7.51 $\pm$ 0.42                | 7.12 $\pm$ 0.64               | 8.10 $\pm$ 0.41               | 6.35 $\pm$ 0.28              | 0.060                |
| <i>cx32.2</i>      | 95.30 $\pm$ 9.78               | 80.92 $\pm$ 8.33              | 68.93 $\pm$ 10.83             | 68.20 $\pm$ 8.00             | 0.160                |
| <i>cxadr</i>       | 5.02 $\pm$ 0.34                | 4.25 $\pm$ 0.46               | 4.66 $\pm$ 0.24               | 4.00 $\pm$ 0.16              | 0.108                |
| <i>alpi</i>        | 67.89 $\pm$ 9.78               | 61.19 $\pm$ 10.40             | 55.41 $\pm$ 9.12              | 65.75 $\pm$ 10.49            | 0.777                |
| <i>fabp1</i>       | 119.10 $\pm$ 7.40              | 112.74 $\pm$ 11.75            | 109.79 $\pm$ 5.30             | 101.19 $\pm$ 6.01            | 0.211                |
| <i>fabp2</i>       | 835.42 $\pm$ 131.39            | 772.79 $\pm$ 119.22           | 891.79 $\pm$ 119.74           | 702.29 $\pm$ 71.58           | 0.780                |
| <i>fabp6</i>       | 0.13 $\pm$ 0.06                | 0.03 $\pm$ 0.01               | 0.03 $\pm$ 0.01               | 0.02 $\pm$ 0.01              | 0.863                |
| <i>muc2</i>        | 36.90 $\pm$ 2.25               | 34.90 $\pm$ 1.36              | 37.06 $\pm$ 3.94              | 31.92 $\pm$ 4.55             | 0.456                |
| <i>muc13</i>       | 117.68 $\pm$ 7.82              | 101.79 $\pm$ 8.13             | 114.59 $\pm$ 9.31             | 104.98 $\pm$ 3.14            | 0.423                |
| <i>tnf-alpha</i>   | 0.21 $\pm$ 0.02                | 0.21 $\pm$ 0.02               | 0.18 $\pm$ 0.02               | 0.18 $\pm$ 0.02              | 0.396                |
| <i>il1b</i>        | 0.18 $\pm$ 0.02                | 0.19 $\pm$ 0.02               | 0.15 $\pm$ 0.01               | 0.18 $\pm$ 0.02              | 0.471                |
| <i>il6</i>         | 0.03 $\pm$ 0.00                | 0.04 $\pm$ 0.01               | 0.03 $\pm$ 0.00               | 0.03 $\pm$ 0.00              | 0.227                |
| <i>il7</i>         | 0.82 $\pm$ 0.07                | 0.93 $\pm$ 0.07               | 0.84 $\pm$ 0.06               | 0.88 $\pm$ 0.05              | 0.634                |
| <i>il8</i>         | 0.22 $\pm$ 0.02                | 0.27 $\pm$ 0.03               | 0.26 $\pm$ 0.03               | 0.24 $\pm$ 0.03              | 0.440                |
| <i>il10</i>        | 0.17 $\pm$ 0.02                | 0.14 $\pm$ 0.02               | 0.16 $\pm$ 0.02               | 0.13 $\pm$ 0.01              | 0.264                |
| <i>il12b</i>       | 0.63 $\pm$ 0.05                | 0.59 $\pm$ 0.05               | 0.68 $\pm$ 0.08               | 0.53 $\pm$ 0.04              | 0.277                |
| <i>il15</i>        | 0.59 $\pm$ 0.03                | 0.60 $\pm$ 0.05               | 0.69 $\pm$ 0.04               | 0.60 $\pm$ 0.03              | 0.295                |
| <i>il34</i>        | 2.66 $\pm$ 0.12                | 2.62 $\pm$ 0.12               | 2.45 $\pm$ 0.11               | 2.71 $\pm$ 0.13              | 0.491                |
| <i>cd4-full</i>    | 0.59 $\pm$ 0.11                | 0.54 $\pm$ 0.08               | 0.56 $\pm$ 0.05               | 0.52 $\pm$ 0.07              | 0.925                |
| <i>cd8b</i>        | 0.06 $\pm$ 0.01                | 0.09 $\pm$ 0.01               | 0.07 $\pm$ 0.01               | 0.06 $\pm$ 0.00              | 0.431                |
| <i>ccr3</i>        | 1.68 $\pm$ 0.17                | 1.84 $\pm$ 0.25               | 1.39 $\pm$ 0.08               | 1.72 $\pm$ 0.14              | 0.292                |
| <i>ccr9</i>        | 1.21 $\pm$ 0.10                | 1.24 $\pm$ 0.12               | 1.14 $\pm$ 0.06               | 1.17 $\pm$ 0.10              | 0.962                |
| <i>ccr11</i>       | 4.65 $\pm$ 0.72                | 3.31 $\pm$ 0.41               | 4.34 $\pm$ 0.50               | 3.25 $\pm$ 0.25              | 0.125                |
| <i>ck8 / ccl20</i> | 6.57 $\pm$ 0.43                | 6.94 $\pm$ 0.67               | 8.15 $\pm$ 0.96               | 7.65 $\pm$ 0.37              | 0.414                |
| <i>csflr1</i>      | 1.06 $\pm$ 0.07                | 1.15 $\pm$ 0.08               | 1.03 $\pm$ 0.09               | 0.95 $\pm$ 0.06              | 0.308                |
| <i>Igm</i>         | 3.77 $\pm$ 0.66                | 4.05 $\pm$ 0.74               | 3.67 $\pm$ 0.94               | 3.92 $\pm$ 1.24              | 0.928                |
| <i>igt-m</i>       | 0.36 $\pm$ 0.04                | 0.37 $\pm$ 0.06               | 0.39 $\pm$ 0.07               | 0.29 $\pm$ 0.05              | 0.409                |
| <i>Igals1</i>      | 13.55 $\pm$ 1.58               | 12.45 $\pm$ 1.51              | 13.27 $\pm$ 1.59              | 11.60 $\pm$ 1.20             | 0.762                |
| <i>Igals8</i>      | 2.84 $\pm$ 0.16                | 2.50 $\pm$ 0.18               | 2.94 $\pm$ 0.26               | 2.66 $\pm$ 0.18              | 0.420                |
| <i>tlr2</i>        | 0.54 $\pm$ 0.04                | 0.47 $\pm$ 0.03               | 0.48 $\pm$ 0.03               | 0.45 $\pm$ 0.03              | 0.349                |
| <i>tlr5</i>        | 0.06 $\pm$ 0.01                | 0.05 $\pm$ 0.01               | 0.06 $\pm$ 0.01               | 0.04 $\pm$ 0.00              | 0.148                |
| <i>tlr9</i>        | 0.06 $\pm$ 0.01                | 0.06 $\pm$ 0.01               | 0.06 $\pm$ 0.01               | 0.05 $\pm$ 0.01              | 0.881                |
| <i>cd209d</i>      | 0.16 $\pm$ 0.02                | 0.15 $\pm$ 0.03               | 0.12 $\pm$ 0.02               | 0.13 $\pm$ 0.02              | 0.724                |
| <i>cd302</i>       | 8.40 $\pm$ 0.32                | 7.91 $\pm$ 0.43               | 8.41 $\pm$ 0.58               | 7.53 $\pm$ 0.43              | 0.437                |
| <i>mrc1</i>        | 1.60 $\pm$ 0.09                | 1.94 $\pm$ 0.27               | 1.64 $\pm$ 0.11               | 1.63 $\pm$ 0.10              | 0.738                |
| <i>fcl</i>         | 7.32 $\pm$ 3.06                | 4.82 $\pm$ 1.59               | 4.41 $\pm$ 1.59               | 1.38 $\pm$ 0.97              | 0.107                |

<sup>1</sup>P values result from one-way ANOVA. Different superscript letters in each row indicate significant differences among dietary treatments (Tukey post-hoc test  $P < 0.05$ ).

**Table S2.** Relative gene expression profiling of anterior intestine in gilthead seabream juveniles fed experimental diets for 8 weeks. Data are the mean  $\pm$  SEM (n=9). All data values for each tissue were in reference to the expression level of *cldn12* of CTRL fish with an arbitrary assigned value of 1.

|                    | CTRL                            | MG                             | Phaco21                         | Phaco37                       | P-value <sup>1</sup> |
|--------------------|---------------------------------|--------------------------------|---------------------------------|-------------------------------|----------------------|
| <i>pcna</i>        | 6.48 $\pm$ 0.58                 | 7.08 $\pm$ 0.42                | 7.01 $\pm$ 0.59                 | 6.99 $\pm$ 0.59               | 0.788                |
| <i>hes1-b</i>      | 0.71 $\pm$ 0.17                 | 0.63 $\pm$ 0.04                | 0.70 $\pm$ 0.05                 | 1.02 $\pm$ 0.23               | 0.402                |
| <i>klf4</i>        | 2.40 $\pm$ 0.23                 | 2.17 $\pm$ 0.21                | 2.70 $\pm$ 0.35                 | 2.08 $\pm$ 0.15               | 0.448                |
| <i>cldn12</i>      | 0.92 $\pm$ 0.08                 | 0.85 $\pm$ 0.07                | 0.93 $\pm$ 0.08                 | 0.91 $\pm$ 0.06               | 0.868                |
| <i>cldn15</i>      | 36.90 $\pm$ 3.93                | 39.04 $\pm$ 3.47               | 44.59 $\pm$ 3.52                | 42.56 $\pm$ 2.86              | 0.397                |
| <i>cdh1</i>        | 21.37 $\pm$ 1.03                | 22.56 $\pm$ 0.83               | 20.94 $\pm$ 1.56                | 19.93 $\pm$ 1.14              | 0.471                |
| <i>cdh17</i>       | 67.56 $\pm$ 2.31                | 69.25 $\pm$ 2.03               | 69.82 $\pm$ 4.91                | 66.67 $\pm$ 3.73              | 0.937                |
| <i>tjp1</i>        | 0.50 $\pm$ 0.02                 | 0.47 $\pm$ 0.03                | 0.50 $\pm$ 0.05                 | 0.41 $\pm$ 0.03               | 0.202                |
| <i>dsp</i>         | 4.31 $\pm$ 0.28                 | 3.58 $\pm$ 0.27                | 4.38 $\pm$ 0.44                 | 4.20 $\pm$ 0.34               | 0.308                |
| <i>cx32.2</i>      | 123.59 $\pm$ 16.89 <sup>a</sup> | 66.78 $\pm$ 8.39 <sup>b</sup>  | 68.64 $\pm$ 10.75 <sup>ab</sup> | 64.56 $\pm$ 6.85 <sup>b</sup> | <b>0.034</b>         |
| <i>cxadr</i>       | 5.02 $\pm$ 0.41                 | 4.46 $\pm$ 0.46                | 5.16 $\pm$ 0.43                 | 4.23 $\pm$ 0.39               | 0.296                |
| <i>alpi</i>        | 79.98 $\pm$ 11.58               | 83.98 $\pm$ 12.39              | 68.88 $\pm$ 10.80               | 67.95 $\pm$ 7.74              | 0.798                |
| <i>fabp1</i>       | 220.17 $\pm$ 24.84              | 180.66 $\pm$ 15.00             | 203.05 $\pm$ 16.45              | 164.57 $\pm$ 14.70            | 0.162                |
| <i>fabp2</i>       | 1144.00 $\pm$ 114.86            | 931.28 $\pm$ 93.59             | 879.36 $\pm$ 61.09              | 786.87 $\pm$ 67.85            | 0.094                |
| <i>fabp6</i>       | 0.03 $\pm$ 0.01                 | 0.05 $\pm$ 0.02                | 0.04 $\pm$ 0.02                 | 0.03 $\pm$ 0.01               | <b>0.049</b>         |
| <i>muc2</i>        | 21.84 $\pm$ 2.71                | 17.65 $\pm$ 2.57               | 19.77 $\pm$ 4.03                | 18.13 $\pm$ 2.64              | 0.737                |
| <i>muc13</i>       | 127.18 $\pm$ 5.91               | 126.41 $\pm$ 7.70              | 117.73 $\pm$ 8.32               | 114.57 $\pm$ 9.25             | 0.516                |
| <i>tnf-alpha</i>   | 0.19 $\pm$ 0.03                 | 0.19 $\pm$ 0.01                | 0.21 $\pm$ 0.02                 | 0.17 $\pm$ 0.02               | 0.534                |
| <i>il1b</i>        | 0.13 $\pm$ 0.02                 | 0.13 $\pm$ 0.01                | 0.12 $\pm$ 0.02                 | 0.10 $\pm$ 0.01               | 0.628                |
| <i>il6</i>         | 0.02 $\pm$ 0.00                 | 0.02 $\pm$ 0.00                | 0.02 $\pm$ 0.00                 | 0.02 $\pm$ 0.00               | 0.461                |
| <i>il7</i>         | 2.58 $\pm$ 0.72                 | 2.50 $\pm$ 0.99                | 1.94 $\pm$ 0.56                 | 1.35 $\pm$ 0.41               | 0.558                |
| <i>il8</i>         | 0.24 $\pm$ 0.05                 | 0.17 $\pm$ 0.03                | 0.22 $\pm$ 0.04                 | 0.17 $\pm$ 0.02               | 0.584                |
| <i>il10</i>        | 0.10 <sup>a</sup> $\pm$ 0.01    | 0.06 <sup>b</sup> $\pm$ 0.01   | 0.09 <sup>ab</sup> $\pm$ 0.01   | 0.08 <sup>ab</sup> $\pm$ 0.01 | <b>0.042</b>         |
| <i>il12b</i>       | 0.59 $\pm$ 0.08                 | 0.48 $\pm$ 0.04                | 0.56 $\pm$ 0.04                 | 0.42 $\pm$ 0.04               | 0.107                |
| <i>il15</i>        | 4.06 $\pm$ 1.26                 | 2.57 $\pm$ 1.19                | 2.84 $\pm$ 0.81                 | 1.33 $\pm$ 0.37               | 0.324                |
| <i>il34</i>        | 3.65 $\pm$ 0.39                 | 3.78 $\pm$ 0.59                | 3.82 $\pm$ 0.33                 | 2.77 $\pm$ 0.30               | 0.186                |
| <i>cd4-full</i>    | 0.34 $\pm$ 0.02                 | 0.28 $\pm$ 0.02                | 0.35 $\pm$ 0.04                 | 0.35 $\pm$ 0.04               | 0.406                |
| <i>cd8b</i>        | 0.09 $\pm$ 0.01                 | 0.10 $\pm$ 0.03                | 0.08 $\pm$ 0.01                 | 0.08 $\pm$ 0.01               | 0.906                |
| <i>ccr3</i>        | 2.52 $\pm$ 0.51                 | 2.00 $\pm$ 0.71                | 1.87 $\pm$ 0.40                 | 1.43 $\pm$ 0.25               | 0.325                |
| <i>ccr9</i>        | 3.24 $\pm$ 0.35                 | 2.79 $\pm$ 0.16                | 2.93 $\pm$ 0.42                 | 2.45 $\pm$ 0.24               | 0.329                |
| <i>ccr11</i>       | 6.23 $\pm$ 1.09                 | 7.70 $\pm$ 1.49                | 8.40 $\pm$ 1.48                 | 7.40 $\pm$ 0.88               | 0.695                |
| <i>ck8 / ccl20</i> | 7.74 $\pm$ 0.62                 | 5.90 $\pm$ 0.60                | 6.89 $\pm$ 0.50                 | 6.10 $\pm$ 0.50               | 0.068                |
| <i>csflr1</i>      | 1.12 $\pm$ 0.08                 | 1.18 $\pm$ 0.09                | 1.28 $\pm$ 0.08                 | 1.14 $\pm$ 0.08               | 0.594                |
| <i>igm</i>         | 5.09 $\pm$ 0.54                 | 4.21 $\pm$ 0.67                | 5.40 $\pm$ 1.03                 | 5.73 $\pm$ 0.59               | 0.221                |
| <i>igt-m</i>       | 0.41 $\pm$ 0.08                 | 0.24 $\pm$ 0.04                | 0.35 $\pm$ 0.04                 | 0.23 $\pm$ 0.02               | <b>0.039</b>         |
| <i>lgals1</i>      | 11.38 $\pm$ 1.25                | 8.56 $\pm$ 0.52                | 9.60 $\pm$ 0.97                 | 8.71 $\pm$ 0.89               | 0.240                |
| <i>lgals8</i>      | 7.34 $\pm$ 1.59                 | 5.56 $\pm$ 0.82                | 5.12 $\pm$ 0.72                 | 6.11 $\pm$ 1.01               | 0.698                |
| <i>tlr2</i>        | 3.23 $\pm$ 1.08                 | 3.75 $\pm$ 1.62                | 2.83 $\pm$ 0.83                 | 2.10 $\pm$ 1.03               | 0.737                |
| <i>tlr5</i>        | 0.06 $\pm$ 0.01                 | 0.06 $\pm$ 0.01                | 0.05 $\pm$ 0.01                 | 0.06 $\pm$ 0.01               | 0.844                |
| <i>tlr9</i>        | 0.09 $\pm$ 0.01                 | 0.08 $\pm$ 0.01                | 0.10 $\pm$ 0.01                 | 0.06 $\pm$ 0.01               | <b>0.046</b>         |
| <i>cd209d</i>      | 1.54 $\pm$ 0.55                 | 1.38 $\pm$ 0.65                | 0.76 $\pm$ 0.27                 | 0.37 $\pm$ 0.15               | 0.361                |
| <i>cd302</i>       | 15.69 $\pm$ 2.22                | 13.96 $\pm$ 1.79               | 14.11 $\pm$ 1.54                | 11.63 $\pm$ 1.50              | 0.401                |
| <i>mrc1</i>        | 3.25 $\pm$ 0.81                 | 3.22 $\pm$ 1.26                | 2.54 $\pm$ 0.67                 | 1.29 $\pm$ 0.27               | 0.290                |
| <i>fcl</i>         | 8.61 <sup>a</sup> $\pm$ 3.22    | 13.40 <sup>ab</sup> $\pm$ 7.50 | 8.10 <sup>a</sup> $\pm$ 3.53    | 0.38 <sup>b</sup> $\pm$ 0.11  | <b>0.019</b>         |

<sup>1</sup>P values result from one-way ANOVA. Different superscript letters in each row indicate significant differences among dietary treatments (Tukey post-hoc test  $P < 0.05$ ).

**Table S3.** Primers for qPCR amplification in seabream.

| Gene                                           | Symbol        | GenBank  | Primer sequence                                                            |
|------------------------------------------------|---------------|----------|----------------------------------------------------------------------------|
| Proliferating cell nuclear antigen             | <i>pcna</i>   | KF857335 | F: CGT ATC TGC CGT GAC CTG T<br>R: AGA ACT TGA CTC CGT CCT TGG             |
| Transcription factor HES-1-B                   | <i>hes1-b</i> | KF857344 | F: GCC TGC CGA TAT GAT GGA A<br>R: GGA GTT GTG TTC ATG CTT GC              |
| Krueppel-like factor 4                         | <i>klf4</i>   | KF857346 | F: ACA TCA CCG CAC GCA CAC<br>R: AAC CAC AGC CCT CCC AGT C                 |
| Claudin-12                                     | <i>cldn12</i> | KF861992 | F: CTC TCA GGG CTA CAC ATC TAC CTA TGC<br>R: ACA TTC GTG AGC GGC TGG AG    |
| Claudin-15                                     | <i>cldn15</i> | KF861993 | F: CCG ATT GTG GAA GTA GTG GCT CTG GT<br>R: CAG CAT CAC CCA ACC GAC GAA CC |
| Cadherin-1                                     | <i>cdh1</i>   | KF861995 | F: TGC TCC ATA CAG CGT CAC CTT ACA<br>R: CTC GTT CAT CCT AGC CGT CCA GTT   |
| Cadherin-17                                    | <i>cdh17</i>  | KF861996 | F: GAT GCC CGC AAC CCA GAG<br>R: CCG TTG ATT CAC TGC CGT AGA C             |
| Tight junction protein ZO-1                    | <i>tjp1</i>   | KF861994 | F: AAG CAG TAT TAC GGT GAC TCA<br>R: TGC ATC CCT GGC TTG TAG               |
| Desmoplakin                                    | <i>dsp</i>    | KF861999 | F: GCA GAA GGA GCA CGA GAC CATC<br>R: GGG TGT TCT TGT CGC AGG TGA A        |
| Gap junction Cx32.2 protein                    | <i>cx32.2</i> | KF862000 | F: CGA GGT GTT CTA TCT GCT CTG TA<br>R: CTT GTG GGT GCG AGT CCT            |
| Coxsackievirus and adenovirus receptor homolog | <i>cxadr</i>  | KF861998 | F: CAT CAG AGG ACT ACG AGA GG<br>R: CAT CTT GGC AGC ATT TGG T              |
| Intestinal-type alkaline phosphatase           | <i>alpi</i>   | KF857309 | F: CCG CTA TGA GTT GGA CCG TGA T<br>R: GCT TTC TCC ACC ATC TCA GTA AGG G   |
| Liver type fatty acid-binding protein          | <i>fabp1</i>  | KF857311 | F: GTC CTC GTC AAC ACC TTC ACC AT<br>R: CGC CTT CAT CTT CTC GCC AGT        |
| Intestinal fatty acid-binding protein          | <i>fabp2</i>  | KF857310 | F: CGA GCA CAT TCC GCA CCA AAG<br>R: CCC ACG CAC CCG AGA CTT C             |
| Ileal fatty acid-binding protein               | <i>fabp6</i>  | KF857312 | F: ACC CAG GAC GGC AAT ACC<br>R: CGA CGG TGA AGT TGT TGG T                 |

|                               |                  |          |                                                                                        |
|-------------------------------|------------------|----------|----------------------------------------------------------------------------------------|
| Mucin 2                       | <i>muc2</i>      | JQ277710 | F: ACG CTT CAG CAA TCG CAC CAT<br>R: CCA CAA CCA CAC TCC TCC ACA T                     |
| Mucin 13                      | <i>muc13</i>     | JQ277713 | F: TTC AAA CCC GTG TGG TCC AG<br>R: GCA CAA GCA GAC ATA GTT CGG ATA T                  |
| Tumor necrosis factor-alpha   | <i>tnf-alpha</i> | AJ413189 | F: CAG GCG TCG TTC AGA GTC TC<br>R: CTG TGG CTG AGA GCT GTG AG                         |
| Interleukin-1 beta            | <i>il1b</i>      | AJ419178 | F: GCG ACC TAC CTG CCA CCT ACA CC<br>R: TCG TCC ACC GCC TCC AGA TGC                    |
| Interleukin-6                 | <i>il6</i>       | EU244588 | F: TCT TGA AGG TGG TGC TGG AAG TG<br>R: AAG GAC AAT CTG CTG GAA GTG AGG                |
| Interleukin 7                 | <i>il7</i>       | JX976618 | F: CTA TCT CTG TCC CTG TCC TGT GA<br>R: TGC GGA TGG TTG CCT TGT AAT                    |
| Interleukin-8                 | <i>il8</i>       | JX976619 | F: CAG CAG AGT CTT CAT CGT CAC TAT TG<br>R: AGG CTC GCT TCA CTG ATG G                  |
| Interleukin-10                | <i>il10</i>      | JX976621 | F: AAC ATC CTG GGC TTC TAT CTG<br>R: GTG TCC TCC GTC TCA TCT G                         |
| Interleukin 12 subunit beta   | <i>il12b</i>     | JX976624 | F: ATT CCC TGT GTG GTG GCT GCT<br>R: GCT GGC ATC CTG GCA CTG AAT                       |
| Interleukin 15                | <i>il15</i>      | JX976625 | F: GAG ACC AGC GAG CGA AAG GCA TCC<br>R: GCC AGA ACA GGT TAC AGG TTG ACA<br>GGA A      |
| Interleukin 34                | <i>il34</i>      | JX976629 | F: TCT GTC TGC CTG CTG GTA G<br>R: ATG CTG GCT GGT GTC TGG                             |
| CD4                           | <i>cd4</i>       | AM489485 | F: TCCTCCTCCTCGTCCTCGTT<br>R: GGTGTCTCATCTCCGCTGTCT                                    |
| CD8 beta                      | <i>cd8b</i>      | KX231275 | F: CCGAAATGTGGAAGACTGGAACTC<br>R: CTTTGGAGGTAAGGTTGGAGGGAT                             |
| C-C chemokine receptor type 3 | <i>ccr3</i>      | KF857317 | F: CTA CAT CAG CAT CAC CAT ACG CAT CCT<br>R: TGG CAC GGC ACT TCT CCTTCA                |
| C-C chemokine receptor type 9 | <i>ccr9</i>      | KF857318 | F: TCC CTG AGT TAA TCT TCG CCC AAG TG<br>R: TGT TGT ATT CGT TGT TCC AGT AGA<br>CCA GAG |
|                               | <i>ccr11</i>     | KF857319 | F: GCT ACG ATT ACA GTT ATG AA                                                          |

|                                                   |                  |          |                                                                                    |
|---------------------------------------------------|------------------|----------|------------------------------------------------------------------------------------|
| C-C chemokine receptor type 11                    |                  |          | R: TAG ATG ATT GGG AGG AAG                                                         |
| C-C chemokine CK8 / C-C motif chemokine 20        | <i>ck8/ cl20</i> | GU181393 | F: CCG TCC TCA TCT GCT TCA TAC T<br>R: GCT CTG CCG TTG ATG GAA C                   |
| Macrophage colony-stimulating factor 1 receptor 1 | <i>csf1r1</i>    | AM050293 | F: TTG CGT GTG GTG AGG AAG GAA GGT<br>R: AGC AGG CAG GGC AGC AGG TA                |
| Immunoglobulin M                                  | <i>igm</i>       | JQ811851 | F: ACC TCA GCG TCC TTC AGT GTT TAT GAT GCC<br>R: CAG CGT CGT CGT CAA CAA GCC AAG C |
| Immunoglobulin T membrane-bound form              | <i>igt-m</i>     | KX599201 | F: AGA CGA TGC CAG TGA AGA GGA TGA GT<br>R: CGA AGG AGG AGG CTG TGG ACC A          |
| Galectin-1                                        | <i>lgals1</i>    | KF862003 | F: GTG TGA GGA GGT CCG TGA TG<br>R: ACT GTA GAG CCG TCC GAT AGG                    |
| Galectin-8                                        | <i>lgals8</i>    | KF862004 | F: GGC GGT GAA CGG CGG TCA<br>R: GCT CCA GCT CCA GTC TGT GTT GAT AC                |
| Toll like receptor 2                              | <i>tlr2</i>      | KF857323 | F: CAT CTG CGA CTC TCC TCT CTT CCT<br>R: ATT CAA CAA TGG AGC GGT GGA CTT           |
| Toll like receptor 5                              | <i>tlr5</i>      | KF857324 | F: TCG CCA ATC TGA CGG ACC TGA G<br>R: CAG AAC GCC GAT GTG GTT GTA AGA C           |
| Toll like receptor 9                              | <i>tlr9</i>      | AY751797 | F: GCC TTC CTT GTC TGC TCT TTC T<br>R: GCC GTA GAG GTG CTT CAG TAG                 |
| CD209 antigen-like protein D                      | <i>cd209d</i>    | KF857327 | F: CGC CAC GAG CAT GAG GAC AA<br>R: TCT TGC CAG AAT CCA TCA CCA TCC A              |
| CD302 antigen                                     | <i>cd302</i>     | KF857328 | F: GGA CCA GAG GAA GAG CAC ATC<br>R: GAC CAG GGC GGA CAT CAG                       |
| Macrophage mannose receptor 1                     | <i>mrc1</i>      | KF857326 | F: CTT CCG ACC GTA CCT GTA CCT ACT CA<br>R: CGA TTC CAG CCT TCC GCA CAC TTA        |
| Fucolectin                                        | <i>fcl</i>       | KF857331 | F: CCA TAC TGC TGA ACA GAC CAA CC<br>R: TGA TGG AGG TGA CGA TGT AGG A              |

---
